# Supplementary material
Source: Springer Nature journal article supplement (https://www.springermedizin.de/resource/supplementary/12916_2012_764_MOESM5_ESM.pdf/9598658)

### A) Men

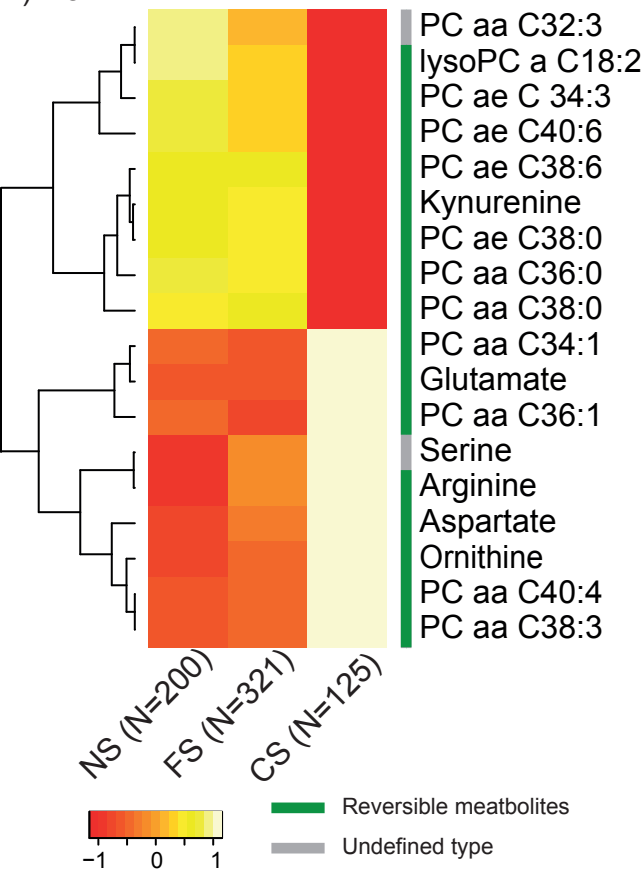

### B) Women

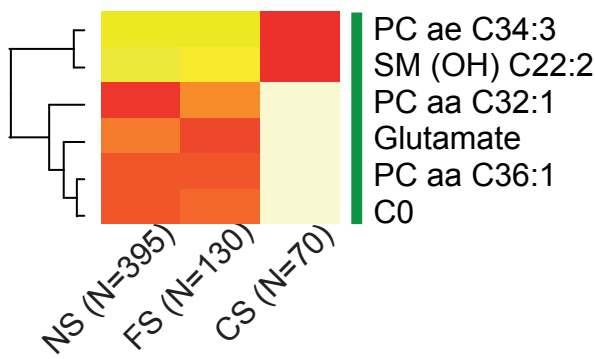

Supplement: MOESM5 [file 9598658]
